# Supplementary material for: S Phase Duration Is Determined by Local Rate and Global Organization of Replication
Source: MDPI journal article supplement (doi:10.3390/biology11050718), 2022-05-07
Supplement: s1 [file s1]

**Table S1. Known Cell Cycle Dynamics of Cells.**

| Cells                          | Organism                             | DNA Content (Gbp) | G1 (h) | S phase (h) | G2 or (G2/M)   | Cell Cycle (h) | Source                         |
|--------------------------------|--------------------------------------|-------------------|--------|-------------|----------------|----------------|--------------------------------|
| C7-10                          | Mosquito ( <i>Aedes albopictus</i> ) |                   | 2      | 6           | 2              | 10             | Gerenday 1996                  |
| CHO                            | Chinese Hamster                      |                   | 7      | 6.7         | 2.79 (G2/M)    | 16             | Rex 2002                       |
| Myelocyte series               | Dog                                  | 4.82              |        | ~5          |                | 16.0-18.0      | Cited by Cameron&Greulich 1963 |
| Myeloblast                     | Dog                                  | 4.82              |        | ~5          |                | 9              | Cited by Cameron&Greulich 1963 |
| Erythroblasts Dog Ref1         | Dog                                  | 4.82              | 2.5    | 6           | 1.5            | 10             | Lala P K 1966                  |
| Erythroblasts Dog Ref2         | Dog                                  | 4.82              | 2.5    | 8           | 1.5            | 12             | Odartchenko N 1963             |
| Early Embryonic Drosophilla    | <i>Drosophilla melanogaster</i>      | 0.24              |        | 0.05        |                |                | Blumenthal 1974                |
| Post MBT Embryonic Drosophilla | <i>Drosophilla melanogaster</i>      | 0.24              |        | 0.6         |                |                | Blumenthal 1974                |
| Kc Drosophilla                 | <i>Drosophilla melanogaster</i>      | 0.24              | 1.8    | 10          | 7.2            | 18.8           | Dolfini 1970                   |
| SL-2 Drosophilla               | <i>Drosophilla melanogaster</i>      | 0.24              |        | 14.0-16.0   | 6.4-8.5 (G2/M) |                | Rizzino 1978                   |
| Ventricular Zone               | Ferret                               | 4.82              |        | 13.3        |                | 49.4           | Hutner 2015                    |
| Inner subventricular zone      | Ferret                               | 4.82              |        | 7           |                | 43             | Hutner 2015                    |
| Outer subventricular zone      | Ferret                               | 4.82              |        | 6.7         |                | 48.7           | Hutner 2015                    |
| Cheek pouch                    | Hamster                              |                   | 120    | 8.6         | 2.4            | 130            | Brown J M & R Oliver 1968      |
| Jejunum Hamster                | Hamster                              |                   | 6      | 8           | 2              | 16             | Lipkin M & Deschner 1968       |
| Carcinoma (cheek pouch)        | Hamster                              |                   | 2.4    | 6           | 2              | 10             | Reiskin A B & R J Berry 1968   |
| Bone marrow                    | Human                                | 6.32              |        | 6.5         |                |                | Cited by Cameron&Greulich 1963 |
| Stomach                        | Human                                | 6.32              |        | 18          | 3              |                | Winawer S J & M Lipkin 1969    |

|                                       |       |      |      |          |               |      |                                   |
|---------------------------------------|-------|------|------|----------|---------------|------|-----------------------------------|
| Ileum                                 | Human | 6.32 |      | 11       | 4             |      | Lipkin M 1965                     |
| Colon Human                           | Human | 6.32 |      | 13       | 2             | 60   | Lipkin M 1963                     |
| Erythroblasts & Myeloblasts           | Human | 6.32 |      | 12       |               |      | Strykmans P 1966                  |
| HeLaK                                 | Human | 9.8  | 8.9  | 9.5      | 3.7           | 22.6 | Cardoso & Bensimon 2016           |
| D283 Medulloblastoma in organ culture | Human |      |      | 9.8      | 7.2           | 29.6 | Rubinstein 1987                   |
| Malignant glioma                      | Human |      |      | 7.0-10.0 |               |      | Rubinstein 1987                   |
| HeLa S3                               | Human |      |      | 6        |               | 25   | Cited by<br>Cameron&Greulich 1963 |
| HeLa                                  | Human |      |      | 8.5      |               | 28   | Cited by<br>Cameron&Greulich 1963 |
| Epithelioma                           | Human |      | 21   | 12       | 5             | 38   | Frindel E 1968                    |
| Leukemia                              | Human |      | 36   | 26       | 4             | 66   | Saunders E F 1967                 |
| Melanoma                              | Human |      | 37   | 21       | 5             | 63   | Shirakawa 1970                    |
| Squamous cell carcinoma Human         | Human |      | 28.8 | 12.5     | 6.9<br>(G2/M) | 50.2 | Friedland & Weinstein<br>1977     |
| MEFs                                  | Mouse | 6.34 |      | 8        |               |      | Fereira 2017                      |
| mESCs                                 | Mouse | 6.34 | 2    | 5        | 2             |      | Fereira 2017                      |
| Embryonic Striatum progenitor         | Mouse | 6.34 |      | 5        |               |      | Bhide 1996                        |
| Esophagus                             | Mouse | 6.34 |      | 6.9      |               | 181  | Greulich 1963                     |
| Tongue                                | Mouse | 6.34 |      | 7        |               | 40   | Greulich 1963                     |
| Duodenum                              | Mouse | 6.34 |      | 7.4      |               | 18.5 | Greulich 1963                     |
| Lower Ileum                           | Mouse | 6.34 |      | 7.1      |               | 16.7 | Greulich 1963                     |
| Colon                                 | Mouse | 6.34 |      | 7.5      |               | 32.6 | Greulich 1963                     |
| Primary Spermatocyte AII              | Mouse | 6.34 | 7.5  | 8        |               |      | Monesi 1962                       |
| Primary Spermatocyte AIII             | Mouse | 6.34 | 8    | 7        |               |      | Monesi 1962                       |
| Primary Spermatocyte AIV              | Mouse | 6.34 | 9.5  | 5.0-6.0  |               |      | Monesi 1962                       |
| Primary Spermatocyte Intermediate     | Mouse | 6.34 | 8.5  | 12.5     | 3.0-4.0       |      | Monesi 1962                       |
| Primary Spermatocytes B               | Mouse | 6.34 | 10.5 | 14.5     | 3.0-4.0       |      | Monesi 1962                       |

|                               |       |      |          |          |         |           |                                   |
|-------------------------------|-------|------|----------|----------|---------|-----------|-----------------------------------|
| Ileum                         | Mouse | 6.34 |          | 7.5      |         | 18.0-19.0 | Cited by<br>Cameron&Greulich 1963 |
| Hair follicle                 | Mouse | 6.34 |          | 7.5      |         | 12        | Cited by<br>Cameron&Greulich 1963 |
| Breast cancer                 | Mouse | 6.34 |          | 10       |         | 24.0-72.0 | Cited by<br>Cameron&Greulich 1963 |
| Tongue                        | Mouse | 6.34 |          | 8.5      |         | 96        | Cited by<br>Cameron&Greulich 1963 |
| Neural tube                   | Mouse | 6.34 | 3        | 4        | 1.5     | 8.5       | Kauffman S L 1966                 |
| Primitive ependymal cells     | Mouse | 6.34 | 4        | 5.5      | 1.5     | 11        | Atlas M & Bond V P 1963           |
| Mesenchymal cells             | Mouse | 6.34 | 13       | 5.5      | 1.5     | 20        | Atlas M & Bond V P 1963           |
| Primitive erythroblasts       | Mouse | 6.34 |          | 11       | 1.5     |           | Atlas M & Bond V P 1963           |
| Corneal epithelium            | Mouse | 6.34 |          | 8        | 5       | 100       | Epifanova O I 1966                |
| Esophagus                     | Mouse | 6.34 |          | 2        | 8       | 30        | Greulich 1964                     |
| Forestomach                   | Mouse | 6.34 | 15       | 13.5     | 2       | 30        | Wolfsberg M 1964                  |
| Duodenum                      | Mouse | 6.34 | 3        | 7.0-11.0 | 1.3     | 10.5-13.0 | Leshner S 1961                    |
| Colon Mouse                   | Mouse | 6.34 | 16       | 7        | 1       | 24        | Lipkin & Quastler 1962            |
| Liver parenchymal cells Mouse | Mouse | 6.34 |          | 8        | 4       |           | Fabrikant J I 1967                |
| Bone marrow all cells         | Mouse | 6.34 | 2        | 4.5      | 2       | 8.5       | Frindel E 1967                    |
| Bladder epithelium            | Mouse | 6.34 | 10       | 6        | 3       | 19        | Levi P E 1969                     |
| Testis spermatogonia          | Mouse | 6.34 | 7.5-10.5 | 7.5-18   | 3.0-8.0 | 26.0-31.0 | Monesi V 1962                     |
| Uterine epithelium            | Mouse | 6.34 | 32       | 8        | 2       | 42        | Epifanova O I 1963                |
| Vaginal epithelium            | Mouse | 6.34 |          | 7.5      | 2       |           | Thrasher J D 1967                 |
| Mammary gland alveoli         | Mouse | 6.34 |          | 9.0-28.0 | 2       |           | Bresciani F 1965                  |
| Epidermis basal cells         | Mouse | 6.34 |          | 7        | 1       | 30        | Devik F 1962                      |
| Ear                           | Mouse | 6.34 |          | 30       | 7       |           | Sherman F G 1961                  |
| Hair follicle Mouse           | Mouse | 6.34 | 3        | 7        | 2       | 12        | Cattaneo S M 1961                 |
| Hair follicle Ref 1 Mouse     | Mouse | 6.34 | 4.5      | 6        | 2       | 12.5      | Griem M L 1966                    |

|                                                  |           |      |      |         |               |      |                                     |
|--------------------------------------------------|-----------|------|------|---------|---------------|------|-------------------------------------|
| Adenocarcinoma Mouse                             | Mouse     | 6.34 | 22   | 10      | 3             | 35   | Mendelsohn M L 1960                 |
| Ehrlich ascite tumor                             | Mouse     | 6.34 | 0.2  | 13      | 3             | 16   | Lala P K 1966                       |
| Fibrosarcoma NCTC 2472                           | Mouse     | 6.34 | 4.9  | 10.4    | 1.7           | 17   | Frindel E 1967                      |
| Sarcoma 180                                      | Mouse     | 6.34 | 2.6  | 8.7     | 2.5           | 14   | Simpson Herren L & HH<br>Lloyd 1970 |
| Neocortical proliferative zone of<br>fetal mouse | Mouse     | 6.34 | 9.3  | 15.1    | 3.8           |      | Takashai 1993                       |
| C2C12                                            | Mouse     | 11.4 | 8.8  | 9.4     | 3.7           | 22.6 | Cardoso & Bensimon 2016             |
| pmel-1 Mice CD8 T cells                          | Mouse     | 6.34 | 1    | 4.7     | 0.3<br>(G2/M) |      | Norie Sugitani 2022                 |
| pmel-1 Mice Fibroblasts                          | Mouse     | 6.34 | 13   | 8.2     | 7.5<br>(G2/M) |      | Norie Sugitani 2022                 |
| pmel-1 Mice B16 cells                            | Mouse     | 6.34 | 7.1  | 9.3     | 0.7<br>(G2/M) |      | Norie Sugitani 2022                 |
| Ventricular zone Pax6+ Tbr2-                     | P1 Ferret | 4.82 | 36.1 | 16.1    | 2             | 55.5 | Garcia 2016                         |
| Ventricular zone Pax6+ Tbr2+                     | P1 Ferret | 4.82 | 36.3 | 19.7    | 2             | 58.5 | Garcia 2016                         |
| Inner subventricular zone Pax6+<br>Tbr2-         | P1 Ferret | 4.82 | 37.7 | 8.6     | 2.2           | 49.4 | Garcia 2016                         |
| Inner subventricular zone Pax6+<br>Tbr2+         | P1 Ferret | 4.82 | 28.6 | 9.4     | 2             | 42   | Garcia 2016                         |
| Inner subventricular zone Pax6-<br>Tbr2+         | P1 Ferret | 4.82 | 39.8 | 1.9     | 1.7           | 45.8 | Garcia 2016                         |
| Outer subventricular zone Pax6+<br>Tbr2-         | P1 Ferret | 4.82 | 45   | 22.6    | 2.1           | 71.3 | Garcia 2016                         |
| Outer subventricular zone Pax6+<br>Tbr2+         | P1 Ferret | 4.82 | 32.4 | 9.7     | 1.9           | 45   | Garcia 2016                         |
| Outer subventricular zone Pax6-<br>Tbr2+         | P1 Ferret | 4.82 | 35.6 | 3.1     | 1.7           | 41.3 | Garcia 2016                         |
| Embryonic midbrain                               | Rat       | 6.57 |      | 7.5-8.6 |               | 15   | Faustman 2003                       |

|                                  |                                         |      |      |         |         |      |                                     |
|----------------------------------|-----------------------------------------|------|------|---------|---------|------|-------------------------------------|
| Squamous cell carcinoma Rat      | Rat                                     | 6.57 | 15   | 9       | 3       |      | Lane 1980                           |
| Tracheal Epithelium              | Rat                                     | 6.57 |      | 8.0-9.0 | 2.5-3.5 |      | Lane 1976                           |
| Hepatocyte                       | Rat                                     | 6.57 |      | 8       |         |      | Cited by<br>Cameron&Greulich 1963   |
| Chondrocyte                      | Rat                                     | 6.57 |      | 8.5     |         |      | Cited by<br>Cameron&Greulich 1963   |
| Metaphsis                        | Rat                                     | 6.57 |      | 8       |         | 36   | Cited by<br>Cameron&Greulich 1963   |
| Endostcum                        | Rat                                     | 6.57 |      | 8       |         | 57   | Cited by<br>Cameron&Greulich 1963   |
| Periosteum                       | Rat                                     | 6.57 |      | 8       |         | 114  | Cited by<br>Cameron&Greulich 1963   |
| Jejunum                          | Rat                                     | 6.57 | 2.5  | 6.5     | 1.5     | 10.5 | Cairnie A B 1965                    |
| Liver parenchymal cells          | Rat                                     | 6.57 | 9    | 9       | 3.5     | 21.5 | Post J & J Hoffman 1964             |
| Tracheobronchial epithelium      | Rat                                     | 6.57 |      | 7       | 3.5     |      | Wells A B 1970                      |
| Erythroblasts 6 week             | Rat                                     | 6.57 | 2    | 4.9-5.0 | 2       | 9    | Roylance P J 1968                   |
| Erythroblast 11-13 week          | Rat                                     | 6.57 | 1.5  | 7.5     | 1.5     | 10.5 | Hanna 1969                          |
| Newborn Cartillage cells         | Rat                                     | 6.57 | 6.8  | 11.6    | 4.6     | 22   | Dixon B 1971                        |
| 6 day old osteoprogenitor cells  | Rat                                     | 6.57 | 14   | 8       | 2       | 24   | Young R w 1962                      |
| Adenocarcinoma                   | Rat                                     | 6.57 | 14   | 9       | 1       | 24   | Simpson Herren L & HH<br>Lloyd 1970 |
| Adenosarcoma BICR/M1             | Rat                                     | 6.57 | 7.5  | 7.5     | 2.7     | 18   | Steel G C 1966                      |
| Fibrosarcoma RIB5                | Rat                                     | 6.57 | 4    | 8       | 1.6     | 13   | Denekamp 1970                       |
| Rhabomyosarcoma                  | Rat                                     | 6.57 | 6.2  | 9.7     | 2.7     | 19   | Hermens A F & G W<br>Barendsen 1967 |
| Hair follicle                    | Sheep                                   | 5.22 | 9.4  | 9.5     | 1.6     | 21   | Downes A M 1966                     |
| Armadillo triticales (Hexaploid) | <i>Triticum + Secale</i><br>(wheat+rye) |      | 2.77 | 5.25    | 2.5     | 11   | Kaltsikes 1972                      |

|                                                  |                                         |        |      |       |      |       |                                     |
|--------------------------------------------------|-----------------------------------------|--------|------|-------|------|-------|-------------------------------------|
| Rosner triticale (Hexaploid)                     | <i>Triticum + Secale</i><br>(wheat+rye) |        | 2.4  | 6.25  | 3.1  | 12    | Kaltsikes 1972                      |
| A-6 Xenopus somatic cell line 18 degrees         | <i>Xenopus laevis</i>                   | 6.2    | 30.2 | 29.5  | 10.1 |       | A. Al-Saleh 1984                    |
| A-6 Xenopus somatic cell line 23 degrees         | <i>Xenopus laevis</i>                   | 6.2    | 15.1 | 16.2  | 4.3  |       | A. Al-Saleh 1984                    |
| A-6 Xenopus somatic cell line 28 degrees         | <i>Xenopus laevis</i>                   | 6.2    | 12   | 13.8  | 3.9  |       | A. Al-Saleh 1984                    |
| <i>S. cerevisiae</i>                             | Yeast                                   | 0.0121 |      | 0.283 |      |       | Amnon Koren 2010                    |
| Arabidopsis                                      | Arabidopsis                             | 0.13   |      | 1.9   |      |       | Arabidopsis Genome Initiative, 2000 |
| Rice cv. Nipponbare Roots                        | Rice cv. <i>Nipponbare</i>              | 0.39   |      | 1.9   |      |       | Matsumoto et al., 2005              |
| Rice cv. Nipponbare Culture                      | Rice cv. <i>Nipponbare</i>              | 0.39   |      | 4.7   |      |       | Matsumoto et al., 2005              |
| Dicotyledon root tip meristem of diploid cells   | <i>Linum usitatissimum</i>              | 1.37   |      | 4.1   |      | 11.2  | Evans & Rees 1971                   |
| Maize cv. B73                                    | Maize cv. B73                           | 2.3    |      | 3.9   |      |       | Schnable et al., 2009               |
| Dicotyledon root tip meristem of diploid cells   | <i>Lycopersicum esculentum</i>          | 3.81   |      | 4.3   |      | 10.6  | Evans & Rees 1971                   |
| Dicotyledon root tip meristem of diploid cells   | <i>Crepis capillaris</i>                | 4.11   |      | 3.25  |      | 10.8  | Evans & Rees 1971                   |
| Barley cv. Morex                                 | Barley cv. Morex                        | 5.1    |      | 2.7   |      |       | Mayer et al., 2012                  |
| Dicotyledon root tip meristem of diploid cells   | <i>Lathyrus angulatus</i>               | 8.70   | 4.4  | 3.9   |      | 12.25 | Evans & Rees 1971                   |
| Monocotyledon root tip meristem of diploid cells | <i>Lolium perenne</i>                   | 9.68   | 0.5  | 4.2   |      | 8.6   | Evans & Rees 1971                   |
| Monocotyledon root tip meristem of diploid cells | <i>Zea mays</i>                         | 10.8   | 0.5  | 4.25  |      | 10.5  | Evans & Rees 1971                   |
| Dicotyledon root tip meristem of diploid cells   | <i>Lathyrus articulatus</i>             | 12.1   | 3.9  | 4.3   |      | 14.25 | Evans & Rees 1971                   |

|                                                  |                                       |       |      |         |     |       |                                   |
|--------------------------------------------------|---------------------------------------|-------|------|---------|-----|-------|-----------------------------------|
| Wheat cv. Chinese Spring                         | Wheat cv. Chinese Spring              | 17    |      | 2.9     |     |       | Brenchley et al., 2012            |
| Dicotyledon root tip meristem of diploid cells   | <i>Lathyrus tingitanus</i>            | 17.7  | 6.3  | 5.3     |     | 16.75 | Evans & Rees 1971                 |
| Monocotyledon root tip meristem of diploid cells | <i>Secale cereale</i>                 | 18.5  | 1    | 6       |     | 11.7  | Evans & Rees 1971                 |
| Dicotyledon root tip meristem of diploid cells   | <i>Lathyrus hirsutus</i>              | 19.7  | 7.8  | 5       |     | 18    | Evans & Rees 1971                 |
| Dicotyledon root tip meristem of diploid cells   | <i>Nigella damascena</i>              | 20.6  | 1.5  | 10.5    |     | 16.5  | Evans & Rees 1971                 |
| Dicotyledon root tip meristem of diploid cells   | <i>Vicia faba</i>                     | 23.4  | 4.9  | 7.3     |     | 19.3  | Evans & Rees 1971                 |
| Monocotyledon root tip meristem of diploid cells | <i>Allium fistulosum</i>              | 25.7  | <0.5 | 7.1     |     | 15.1  | Evans & Rees 1971                 |
| Monocotyledon root tip meristem of diploid cells | <i>A. cepa</i> * <i>A. fistulosum</i> | 29.2  |      | 8.6     |     | 16.6  | Evans & Rees 1971                 |
| Monocotyledon root tip meristem of diploid cells | <i>Allium cepa</i>                    | 32.76 | <0.5 | 9.6     |     | 17.8  | Evans & Rees 1971                 |
| Monocotyledon root tip meristem of diploid cells | <i>Tradescantia paludosa</i>          | 37.9  |      | 10.8    |     | 20    | Evans & Rees 1971                 |
| Monocotyledon root tip meristem of diploid cells | <i>Hyacinthus orientalis</i>          | 48.6  | 0.8  | 13.6    |     | 24    | Evans & Rees 1971                 |
| HCT-116                                          | Human                                 |       | 5.4  | 6.8     | 3.8 | 16    | Fereira 2017                      |
| L-strain cells                                   | L-strain cells                        |       |      | 6.0-7.0 |     | 20    | Cited by<br>Cameron&Greulich 1963 |
| Hamster cells                                    | Hamster cells                         |       |      | 6       |     | 14    | Cited by<br>Cameron&Greulich 1963 |
| Ascites tumor cells                              | Ascites tumor cells                   |       |      | 7.5     |     | 18    | Cited by<br>Cameron&Greulich 1963 |

|                                    |                                            |         |     |         |          |      |                                   |
|------------------------------------|--------------------------------------------|---------|-----|---------|----------|------|-----------------------------------|
| Liver cells                        | Liver cells                                |         |     | 8       |          | 31   | Cited by<br>Cameron&Greulich 1963 |
| L-5178Y ascites                    | L-5178Y ascites                            |         |     | 6.9-7.4 |          |      | Cited by<br>Cameron&Greulich 1963 |
| BNL tumor                          | BNL tumor                                  |         |     | 8       |          | 16   | Cited by<br>Cameron&Greulich 1963 |
| <i>Tradescantia paludosa</i>       | <i>Tradescantia paludosa</i> 2N            |         |     | 10.7    |          |      | Troy & Wimber 1969                |
| <i>Tradescantia paludosa</i>       | <i>Tradescantia paludosa</i><br>24N        |         |     | 10.4    |          |      | Troy & Wimber 1969                |
| <i>Ornithogatum virens</i>         | <i>Ornithogatum virens</i> 2N              |         |     | 7.9     |          |      | Troy & Wimber 1969                |
| <i>Ornithogatum virens</i>         | <i>Ornithogatum virens</i> 4N              |         |     | 7.9     |          |      | Troy & Wimber 1969                |
| <i>Cymbidium</i>                   | <i>Cymbidium</i> 2N                        |         |     | 7.1     |          |      | Troy & Wimber 1969                |
| <i>Cymbidium</i>                   | <i>Cymbidium</i> 4N                        |         |     | 7.7     |          |      | Troy & Wimber 1969                |
| <i>Lycopersicum esculentum</i>     | <i>Lycopersicum esculentum</i><br>2N       |         |     | 7.2     |          |      | Troy & Wimber 1969                |
| <i>Lycopersicum esculentum</i>     | <i>Lycopersicum esculentum</i><br>4N       |         |     | 7.6     |          |      | Troy & Wimber 1969                |
| <i>Chrysanthemum cozymbosum</i>    | <i>Chrysanthemum</i><br><i>cozymbosum</i>  |         |     | 5.9     |          |      | Troy & Wimber 1969                |
| <i>Chrysanthemum yezoense</i>      | <i>Chrysanthemum yezoense</i>              |         |     | 4.8     |          |      | Troy & Wimber 1969                |
| <i>Chrysanthemum arelieum</i>      | <i>Chrysanthemum arelieum</i>              |         |     | 5.1     |          |      | Troy & Wimber 1969                |
| <i>Chrysanthemum lacustre</i>      | <i>Chrysanthemum lacustre</i>              |         |     | 6.3     |          |      | Troy & Wimber 1969                |
| <i>Caulobacter crescentus</i>      | <i>Caulobacter crescentus</i>              |         | 0.5 | 1.3     | 0.3      | 2.5  | Laub 2000                         |
| <i>Escheria coli</i> (Fast Growth) | <i>Escheria coli</i>                       | 0.0046  |     | 0.6     | 0.3      |      | Helmstetter &Cooper 1968          |
| <i>Bacillus subtilis</i> (37oC)    | <i>Bacillus subtilis</i>                   | 0.00421 |     | 0.9     |          |      | M Sharpe 1998                     |
| <i>S. solfataricus</i>             | <i>S. solfataricus</i>                     | 0.0031  |     | 2.6     | 4.25     | 7    | Bernander 1997                    |
| <i>S.acidocaldarius</i>            | <i>S.acidocaldarius</i>                    | 0.0027  |     | 0.9-1.4 | 2.1-2.55 | 3.55 | Bernander 1997                    |
| <i>Phaeodactylum tricornutum</i>   | <i>Phaeodactylum</i><br><i>tricornutum</i> | 0.0274  | 9.4 | 1.4     | 7.6      | 18.7 | Brzezinski 1990                   |



|                                                    |                                                    |                                            |      |     |     |      |                 |
|----------------------------------------------------|----------------------------------------------------|--------------------------------------------|------|-----|-----|------|-----------------|
| <i>Cylindrotheca fusiformis</i>                    | <i>Cylindrotheca fusiformis</i>                    |                                            | 9.4  | 1.1 | 4   | 16.2 | Brzezinski 1990 |
| <i>Thalassiosira weissflogii</i>                   | <i>Thalassiosira weissflogii</i>                   | 16.87                                      | 4.5  | 3.6 | 2.1 | 13.3 | Brzezinski 1990 |
| <i>Thalassiosira pseudonana</i>                    | <i>Thalassiosira pseudonana</i>                    | 0.0324                                     | 6    | 0.3 | 3.1 | 9.8  | Brzezinski 1990 |
| <i>Chaetoceros muellerii</i> var. <i>subsalsum</i> | <i>Chaetoceros muellerii</i> var. <i>subsalsum</i> |                                            | 12.9 | 0.9 | 1.9 | 16.2 | Brzezinski 1990 |
| <i>Minutocellus polymorphus</i>                    | <i>Minutocellus polymorphus</i>                    | 1.86                                       | 10.6 | 1.3 | 0.5 | 13.9 | Brzezinski 1990 |
| <i>Chaetoceros simplex</i>                         | <i>Chaetoceros simplex</i>                         |                                            | 7.8  | 0.8 | 0.3 | 9.6  | Brzezinski 1990 |
|                                                    |                                                    | <b>Source</b>                              |      |     |     |      |                 |
| Dog Genome Size                                    |                                                    | Hoepfner, M. P 2014                        |      |     |     |      |                 |
| <i>Drosophila melanogaster</i> Genome Size         |                                                    | Adams 2000                                 |      |     |     |      |                 |
| Human Genome Size                                  |                                                    | Piovesan 2019 - average of male and female |      |     |     |      |                 |
| Sheep Genome Size                                  |                                                    | Yu Jiang 2014                              |      |     |     |      |                 |
| <i>Xenopus laevis</i> Genome Size                  |                                                    | U Hellsten 2010                            |      |     |     |      |                 |
| <i>S. cerevisiae</i> Genome Size                   |                                                    | Genome size - Belda 2019                   |      |     |     |      |                 |
| <i>Escheria coli</i> Genome Size                   |                                                    | Blattner 1997                              |      |     |     |      |                 |
| <i>Thalassiosira weissflogii</i> Genome Size       |                                                    | Connolly 2008                              |      |     |     |      |                 |
| <i>Minutocellus polymorphus</i> Genome Size        |                                                    | Connolly 2008                              |      |     |     |      |                 |
| <i>Arabidopsis</i> Genome Size                     |                                                    | Arabidopsis Genome Initiative, 2000        |      |     |     |      |                 |
| Conversions from picogram to Gbp                   |                                                    | Dolezel 2003                               |      |     |     |      |                 |
